# Supplementary material for: Preparation of monolayer HSr2Nb3O10nanosheets for photocatalytic hydrogen evolution
Source: Royal Society of Chemistry journal article supplement (doi:10.1039/c9dt02033k), 2019-01-01
Supplement: c9dt02033k1.pdf [file c9dt02033k1.pdf]

†Electronic Supplementary Information

**Preparation of monolayer  $\text{HSr}_2\text{Nb}_3\text{O}_{10}$  nanosheets for  
photocatalytic hydrogen evolution**

Yuying Yang<sup>a</sup>, Jinhua Xiong<sup>a,b</sup>, Yujie Song<sup>a</sup>, Junhua Zou<sup>a</sup>, Ling Wu<sup>a,\*</sup>

- a. State key laboratory of photocatalysis on energy and environment, Fuzhou University,  
Fuzhou 350116, P. R. China
- b. Fujian Provincial Key Laboratory of Clean Energy Materials, Longyan University,  
Longyan 364000, P. R. China.

\* Corresponding author: Ling Wu

E-mail: [wuling@fzu.edu.cn](mailto:wuling@fzu.edu.cn)

Phone: +86-591-22865835

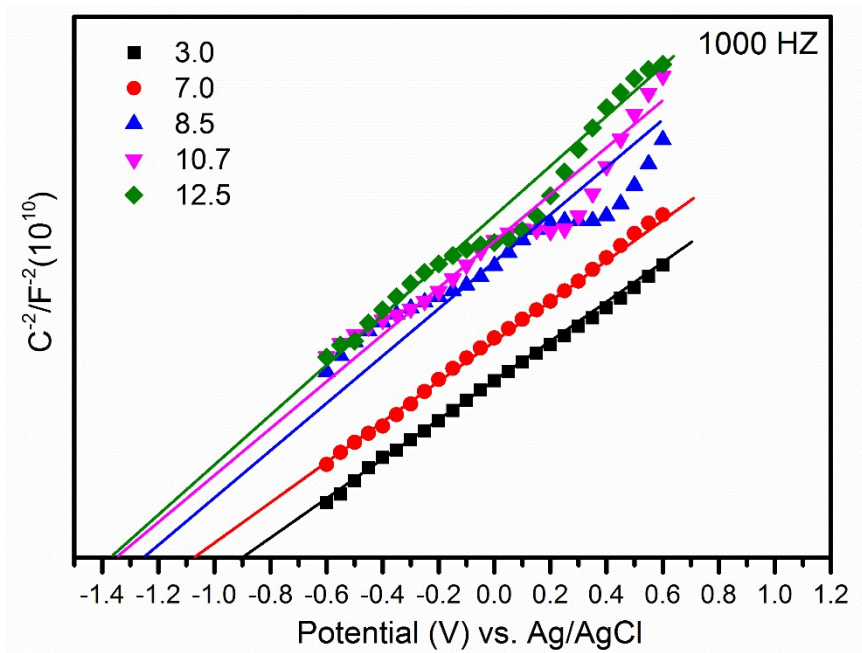

Fig. S1 Typical Mott-Schottky plots of  $\text{HSr}_2\text{Nb}_3\text{O}_{10}$  nanosheets in different pH values.
